# Supplementary material
Source: HighWire-hosted journal article supplement (https://jnm.snmjournals.org/highwire/filestream/94224/field_highwire_adjunct_files/0/jnm087619_Supplemental_Data.pdf)
Supplement: jnm087619_Supplemental_Data.pdf [file jnm087619_Supplemental_Data.pdf]

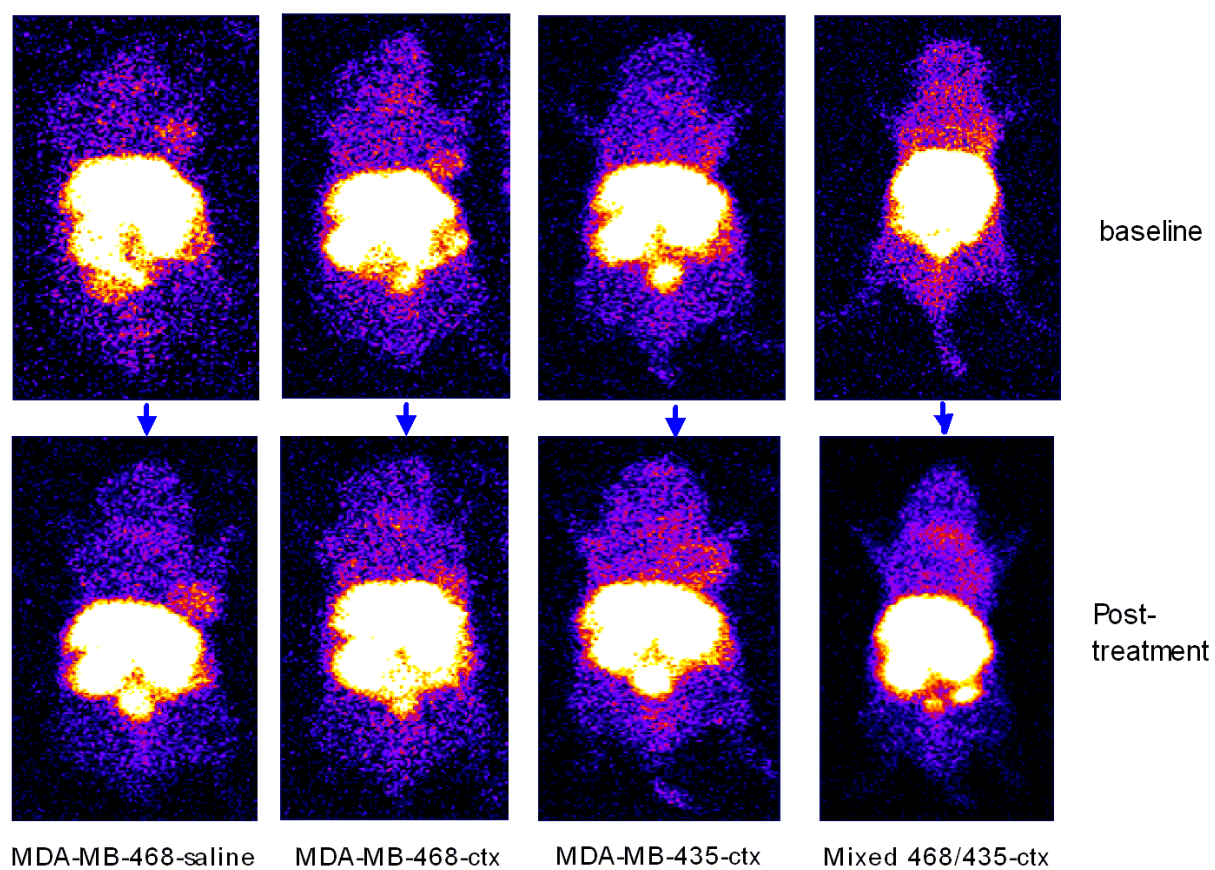

**Supplemental Figure 1.** Representative 4 h  $^{99m}\text{Tc}$ -HYNIC EGF-PEG-Qdot images of animals in each group prior to and following cetuximab (ctx) or saline treatment.

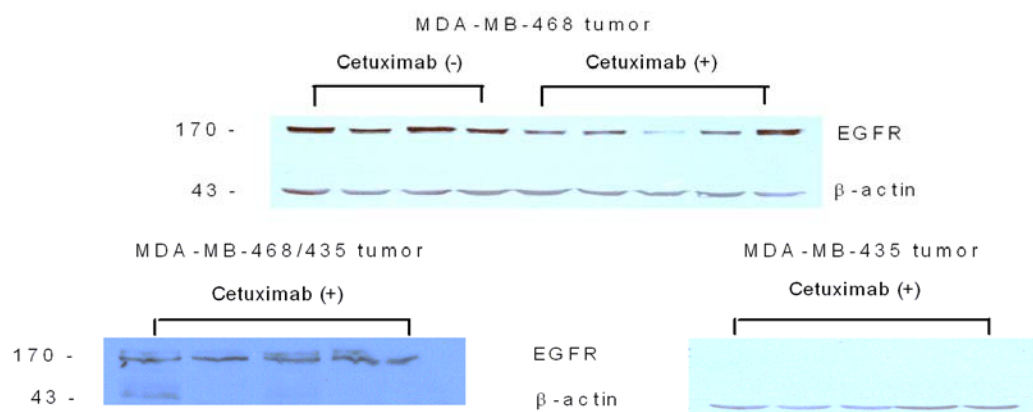

**Supplemental Figure 2.** Immunoblots of tumor EGFR in each group after treatment.
